# Supplementary material for: Self-Reported DHA Supplementation during Pregnancy and Its Association with Obesity or Gestational Diabetes in Relation to DHA Concentration in Cord and Maternal Plasma: Results from NELA, a Prospective Mother-Offspring Cohort
Source: MDPI journal article supplement (doi:10.3390/nu13030843), 2021-03-04
Supplement: s1 [file s1]

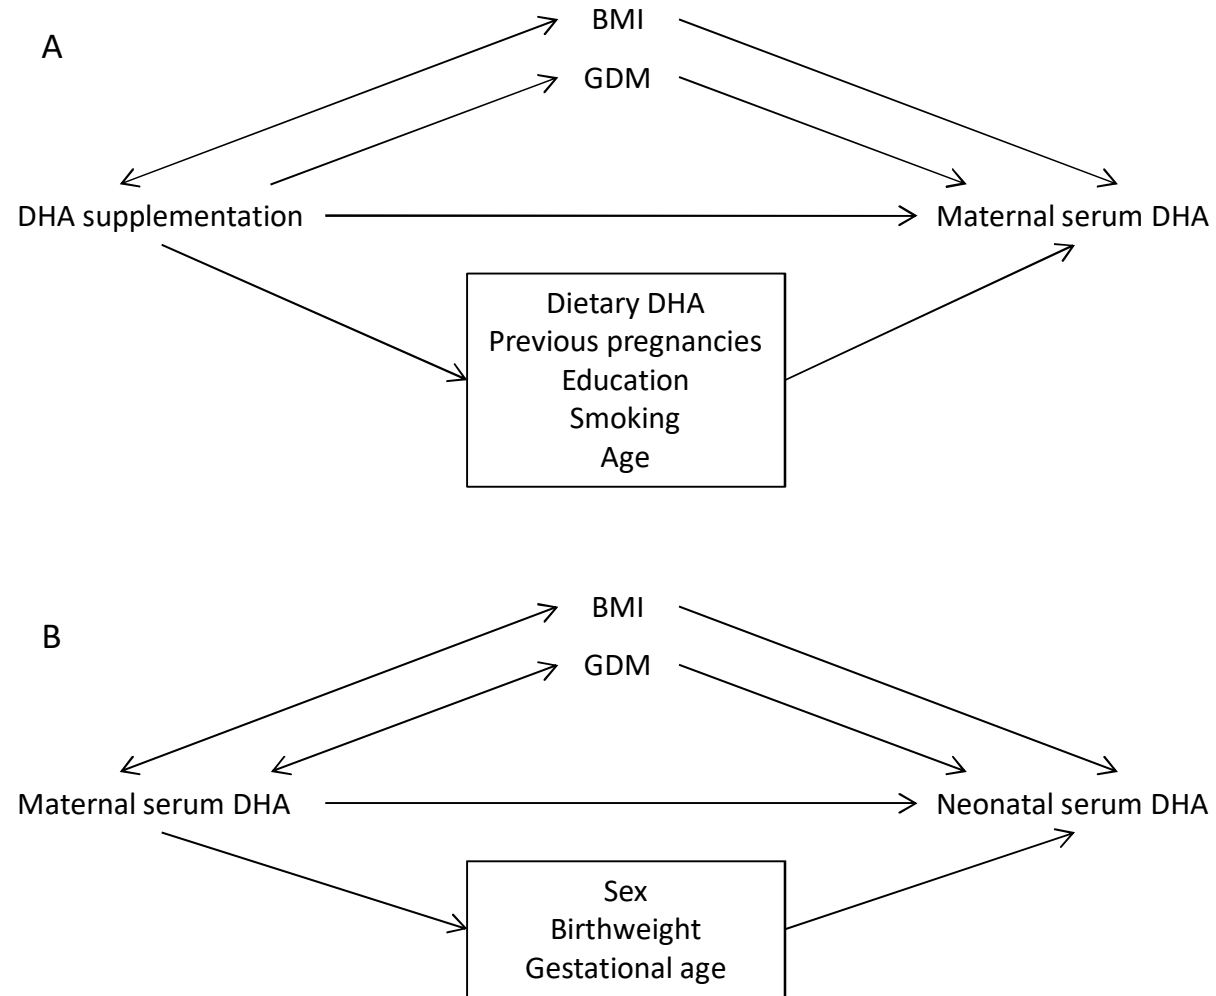

Figure S1. Directed acyclic graph (DAG) used to define potential covariates (box) affecting maternal (A) and neonatal serum DHA (B). BMI, body mass index; GDM, gestational diabetes mellitus.
